# Supplementary material
Source: PubMed Central journal article supplement (PMC7960728)
Supplement: 41392_2021_515_MOESM2_ESM.pdf [file 41392_2021_515_MOESM2_ESM.pdf]

**Supplementary Table 1 Antibodies Details**

| <b>Antibody (Clone name)</b>                          | <b>Species</b> | <b>Manufacturer</b> | <b>Catalogue #</b> | <b>Lot #</b> | <b>Dilution</b> | <b>PMID</b> |
|-------------------------------------------------------|----------------|---------------------|--------------------|--------------|-----------------|-------------|
| <b>List of antibodies used for western blotting</b>   |                |                     |                    |              |                 |             |
| Histone (clone H3)                                    | Rabbit         | Genscript           | A01502             | 18E001481    | 1:1000          | 23833181    |
| HA (16B12)                                            | Mouse          | Biologend           | 901514             | B272772      | 1:1000          | 30247716    |
| HA (polyclonal)                                       | Rabbit         | invitrogen          | 71-5500            | UK293079     | 1:1000          | 29343707    |
| Flag (clone M2)                                       | Mouse          | Sigma               | F3165              | SLBJ46O71    | 1:1000          | 22426228    |
| Flag (polyclonal)                                     | Rabbit         | Sigma               | SAB4301135         | 851135535    | 1:1000          | 26935028    |
| Myc (4A6)                                             | Mouse          | Millipore           | 05-724             | 3095953      | 1:1000          | 30247716    |
| p-IRF3 (clone 4D4G)                                   | Rabbit         | Cell Signal         | 4947               | 13           | 1:500           | 31320712    |
| GAPHD (clone 1E6D9)                                   | Mouse          | Proteintech         | 60004-1-Ig         | 10003343     | 1:1000          | 31058095    |
| Alpha-tubulin (polyclonal)                            | Mouse          | Proteintech         | 11224-1-AP         | 10003004     | 1:1000          | 20197313    |
| IFIT3 (polyclonal)                                    | Rabbit         | Proteintech         | 15201-1-AP         | 00064229     | 1:1000          | 27681138    |
| TBK1 (D1B4)                                           | Rabbit         | Cell Signal         | 3504S              | 4            | 1:1000          | 32209471    |
| p-TBK1 (S172)                                         | Rabbit         | Cell Signal         | 5483S              | 8            | 1:1000          | 32246052    |
| IKK $\beta$ (D30C6)                                   | Rabbit         | Cell Signal         | 8943S              | 4            | 1:1000          | 32268084    |
| p65                                                   | Rabbit         | Proteintech         | 10745-1-AP         | 057102       | 1:1000          | 28358376    |
| GFP                                                   | Rabbit         | Proteintech         | 50430-2-AP         | 00078456     | 1:1000          | 19755120    |
| secondary antibodies goat<br>anti-mouse (polyclonal)  | Goat           | HuaBio              | HA1006             | G180906      | 1:2500          | 28456659    |
| secondary antibodies goat<br>anti-rabbit (polyclonal) | Goat           | HuaBio              | HA1001             | G190128      | 1:2500          | 28456659    |
| anti-HA antibody-agarose<br>conjugate                 | N/A            | Roche               | 610760             | 29732600     | N/A             | 28424289    |
| anti-Flag M2 Affinity<br>Gel (clone M2)               | N/A            | Sigma               | A2220              | SLBT8835     | N/A             | 17274760    |

### Supplementary Table 2 Primers List

| <b>Primer Name</b> | <b>Sequence</b>           | <b>Gene accession number</b> |
|--------------------|---------------------------|------------------------------|
| IFNB1-F            | CGCCGCATTGACCATCTA        | NM_002176                    |
| IFNB1-R            | GACATTAGCCAGGAGGTTCT      |                              |
| CXCL8-F            | CGGAAGGAACCATCTCACTGTG    | NM_000584                    |
| CXCL8-R            | AGAAATCAGGAAGGCTGCCAAG    |                              |
| NFKBIA-F           | ACACCAGGTCAGGATTTTGC      | NM_020529                    |
| NFKBIA-R           | GCTGATGTCAATGCTCAGGA      |                              |
| CXCL10-F           | GCCTCTCCCATCACTTCCCTAC    | NM_001565                    |
| CXCL10-R           | GAAGCAGGGTCAGAACATCCAC    |                              |
| GADD45B-F          | TCGGATTTTGCAATTTCTCC      | NM_015675                    |
| GADD45B-R          | GGATGAGCGTGAAGTGGATT      |                              |
| IER3-F             | GCCGCCTTCTAACTGTGACTC     | NM_003897                    |
| IER3-R             | GTCTCCGCTGTAGTGTTCTGAG    |                              |
| GAPDH-F            | ATGGGGAAGGTGAAGGTCG       | NM_002046                    |
| GAPDH-R            | GGGGTCATTGATGGCAACAATA    |                              |
| IFIT1-F            | GAAGCAGGCAATCACAGAAA      | NM_001548.5                  |
| IFIT1-R            | TGAAACCGACCATAGTGGAA      |                              |
| IFIT2-F            | AATGCCATTTACCTGGAAGTTG    | NM_001547.5                  |
| IFIT2-R            | GTGATAGTAGACCCAGGCATA     |                              |
| IFIT3-F            | AACTACGCCTGGGTCTACTATCACT | NM_001549.6                  |
| IFIT3-R            | ACACCTTCGCCCTTTCATTTTC    |                              |
| TNFAIP3-F          | AATCTTCCCCGGTCTCTGTT      | NM_006290                    |
| TNFAIP3-R          | TACCCTTGGTGACCCTGAAG      |                              |
